# Supplementary material for: Control and regulation of acetate overflow in Escherichia coli
Source: eLife. 2021 Mar 15;10:e63661. doi: 10.7554/eLife.63661 (PMC8021400; doi:10.7554/eLife.63661)
Supplement: Figure 1—source data 1. [file elife-63661-fig1-data1.xlsx]

## Sheet: Acetate 1mM
Figure 1–source data 1. Source data for Figure 1.
	Time	Acetate concentration (mM)	Biomass concentration (gDW/L)	Glucose concentration (mM)	13C-enrichment of acetate (%)
	0	0.958578	0.06308	12.6597	0.057678
	0.75	1.21778	0.10374	11.9168	0.325292
	1.25	1.45604	0.1406	11.9827	0.47816
	1.58	1.61364	0.17138	11.2483	0.569183
	1.92	1.84196	0.21888	10.5389	0.636715
	2.25	2.09436	0.26828	10.0416	0.703457
	2.58	2.34062	0.3268	9.09707	0.762741
	2.92	2.54258	0.38228	7.84107	0.810568
	3.25	2.87071	0.5016	6.57813	0.856652
	3.58	3.21031	0.6384	5.30507	0.887488
	3.92	3.45236	0.7486	3.43947	0.915021
	4.25	3.82533	0.912	1.42053	0.934786

## Sheet: Acetate 10mM
Figure 1–source data 1. Source data for Figure 1.
	Time	Acetate concentration (mM)	Biomass concentration (gDW/L)	Glucose concentration (mM)	13C-enrichment of acetate (%)
	0.08	8.88457	0.07904	13.8065	0.0185025
	0.83	8.85599	0.10678	13.2692	0.0509462
	1.33	9.12489	0.1425	13.2086	0.0940325
	1.83	9.28007	0.19988	11.8222	0.139699
	2.33	9.40272	0.27246	11.5519	0.189155
	2.83	9.66639	0.3914	10.1096	0.268089
	3.33	9.56291	0.5282	8.99527	0.311506
	3.83	9.62505	0.7106	6.93915	0.388161
	4.17	9.69102	0.779	5.19623	0.445788
	4.5	9.55878	0.9386	3.55724	0.501686
	4.83	9.95323	1.1096	0.444964	0.568815

## Sheet: Acetate 30mM
Figure 1–source data 1. Source data for Figure 1.
	Time	Acetate concentration (mM)	Biomass concentration (gDW/L)	Glucose concentration (mM)	13C-enrichment of acetate (%)
	0	29.9278	0.0627	12.6936	0.0118998
	0.72	29.7741	0.09196	12.1504	0.0193919
	1.22	30.245	0.11932	11.9272	0.0268445
	1.55	30.0098	0.14136	11.4909	0.0336616
	1.88	29.6731	0.1748	10.9416	0.0410249
	2.22	30.1202	0.21204	10.3443	0.0471031
	2.55	29.9384	0.2508	10.2381	0.0572582
	2.88	29.7117	0.29108	9.62587	0.0671131
	3.22	29.7474	0.3344	9.24587	0.075374
	3.55	29.8632	0.3876	8.50747	0.0860814
	3.88	29.2348	0.4978	7.41547	0.101289
	4.22	29.0688	0.6118	6.11973	0.119048
	4.72	28.2378	0.7524	4.36613	0.149721
	5.22	27.6481	0.9994	2.0368	0.185932
	5.72	27.1892	1.1172	0.05	0.21434
