# Supplementary material for: Control and regulation of acetate overflow in Escherichia coli
Source: eLife. 2021 Mar 15;10:e63661. doi: 10.7554/eLife.63661 (PMC8021400; doi:10.7554/eLife.63661)
Supplement: Figure 2—source data 1. [file elife-63661-fig2-data1.xlsx]

## Sheet: transcriptomics
Figure 2–source data 1. Source data for Figure 2.
			Acetate concentration (mM)
	Pathway	Gene	0	10	50	100
	glc uptake	ptsG	1	0.6	0.4	0.2
	glc uptake	ptsH	1	0.7	0.5	0.4
	glc uptake	ptsI	1	0.9	0.7	0.7
	glc uptake	crr	1	1	0.8	0.7
	glc uptake	glk	1	0.7	0.6	0.6
	Uper glycolysis	pgi	1	1.1	0.9	1
	Uper glycolysis	pfkA	1	1.1	0.9	1.1
	Uper glycolysis	pfkB	1	1.6	3.7	7.5
	Uper glycolysis	fbaA	1	1.1	1	1.1
	Uper glycolysis	fbaB	1	1.9	3.8	6.9
	Uper glycolysis	tpiA	1	1.1	1.2	1.3
	Lower glycolysis	gapA	1	0.9	0.9	0.6
	Lower glycolysis	pgk	1	1	0.7	0.9
	Lower glycolysis	gpmA	1	0.9	0.8	0.7
	Lower glycolysis	eno	1	1	0.7	0.6
	Lower glycolysis	pykA	1	1	0.9	1.1
	Lower glycolysis	pykF	1	0.8	0.7	0.7
	Lower glycolysis	aceE	1	0.8	0.8	0.7
	Lower glycolysis	aceF	1	1.1	0.9	1
	Acetate	pta	1	1	1.1	1.1
	Acetate	ackA	1	0.9	1	1.1
	Acetate	acs	1	0.7	0.5	0.4
	Acetate	poxB	1	2.8	2.6	8.1
	Anaplerotic	ppc	1	0.9	0.8	0.9
	Anaplerotic	pck	1	0.7	0.4	0.2
	Anaplerotic	maeA	1	1	1	1.1
	Anaplerotic	maeB	1	1	0.6	0.5
	TCA cycle and glyoxylate shunt	gltA	1	1	0.8	0.6
	TCA cycle and glyoxylate shunt	acnA	1	1.2	1.5	2.2
	TCA cycle and glyoxylate shunt	acnB	1	1.1	1	0.8
	TCA cycle and glyoxylate shunt	icd	1	1	0.8	0.6
	TCA cycle and glyoxylate shunt	lpd	1	1	0.8	0.7
	TCA cycle and glyoxylate shunt	sucA	1	1.2	1.3	0.9
	TCA cycle and glyoxylate shunt	sucB	1	1	1	0.6
	TCA cycle and glyoxylate shunt	sucC	1	0.9	0.9	0.6
	TCA cycle and glyoxylate shunt	sucD	1	0.9	0.8	0.5
	TCA cycle and glyoxylate shunt	sdhA	1	1	0.9	0.7
	TCA cycle and glyoxylate shunt	sdhB	1	0.9	0.7	0.5
	TCA cycle and glyoxylate shunt	sdhC	1	1	0.8	0.5
	TCA cycle and glyoxylate shunt	sdhD	1	0.9	0.8	0.5
	TCA cycle and glyoxylate shunt	fumA	1	0.9	0.8	0.6
	TCA cycle and glyoxylate shunt	fumB	1	1.2	1.4	1.3
	TCA cycle and glyoxylate shunt	fumC	1	1	0.5	0.3
	TCA cycle and glyoxylate shunt	mdh	1	1	0.5	0.6
	TCA cycle and glyoxylate shunt	mqo	1	1.5	2.3	2.2
	TCA cycle and glyoxylate shunt	aceA	1	1.1	0.7	0.9
	TCA cycle and glyoxylate shunt	aceB	1	1.2	0.9	1.4
