# Supplementary material for: Control and regulation of acetate overflow in Escherichia coli
Source: eLife. 2021 Mar 15;10:e63661. doi: 10.7554/eLife.63661 (PMC8021400; doi:10.7554/eLife.63661)
Supplement: Figure 3—source data 1. [file elife-63661-fig3-data1.xlsx]

## Sheet: Chemostat (panel A)
Figure 3–source data 1. Source data for Figure 3.
	dilution rate (h-1)	acetate prod rate (mmol/gDW/h)	standard deviation
	0.0958606	0.404723	0.120441
	0.200436	0.739616	0.153163
	0.299782	1.47702	0.0459566
	0.346841	1.21547	0.0274214
	0.399129	1.96935	0.288859
	0.446187	2.09291	0.077764
	0.500218	2.00657	0.286647
	glucose uptake rate (mmol/gDW/h)	standard deviation	acetate uptake rate (mmol/gDW/h)	standard deviation
	1.43478	0.202348	0.381358	0.139547
	2.73913	0.588996	0.762906	0.139471
	4.5913	0.368273	1.4051	0.156976
	4.69565	0.146074	1.17837	0.104575
	5.73913	0.630432	1.99602	0.191797
	5.92174	0.130698	2.0829	0.0174292
	6.10435	0.476304	2.01292	0.243971
	7.12174	0.993618	2.44717	0.522952
	8.34783	0.661851	2.58483	0.331306

## Sheet: Acetate concentration (panel B)
Figure 3–source data 1. Source data for Figure 3.
	acetate concentration (mM)	standard deviation	growth rate (h-1)	standard deviation		acetate concentration (mM)	standard deviation	glucose uptake (mmol/gDW/h)	standard deviation		acetate concentration (mM)	standard deviation	acetate production (mmol/gDW/h)	standard deviation
	0.451965	0.262318	0.521129	0.0017931		0.451965	0.262318	8.65486	0.337812		0.2	0.05	3.5	0.35
	1.116	0.281362	0.611149	0.00204808		1.116	0.281362	8.36128	0.385313		100	10	-2.7	0.27
	2.04719	0.289528	0.613162	0.00219396		2.04719	0.289528	7.9801	0.37377		0.451965	0.262318	1.517	0.316118
	2.86252	0.302351	0.502534	0.00170921		2.86252	0.302351	9.23694	0.356787		1.116	0.281362	1.26845	0.388752
	5.28591	0.327706	0.49629	0.00184621		5.28591	0.327706	8.27442	0.334673		2.04719	0.289528	0.775821	0.407153
	9.10616	0.330782	0.488202	0.0017574		9.10616	0.330782	7.56043	0.317509		2.86252	0.302351	0.678877	0.333576
	16.6748	0.277259	0.547636	0.00182138		16.6748	0.277259	7.33919	0.288026		5.28591	0.327706	0.0173665	0.373338
	16.7663	0.233957	0.49983	0.0010257		16.7663	0.233957	5.77531	0.160533		9.10616	0.330782	-0.991478	0.34703
	17.0022	0.318839	0.474554	0.00194091		17.0022	0.318839	6.42339	0.375934		16.6748	0.277259	-1.28669	0.280502
	30.8668	0.300578	0.425357	0.00120471		30.8668	0.300578	5.15448	0.293148		16.7663	0.233957	-2.07847	0.195031
	57.9229	0.313372	0.377535	0.00199919		57.9229	0.313372	3.93863	0.359226		17.0022	0.318839	-1.53084	0.376252
	0.478353	0.231202	0.645724	0.00141837		0.478353	0.231202	8.11545	0.197332		30.8668	0.300578	-1.52534	0.226182
	4.55673	0.264687	0.618476	0.0019326		4.55673	0.264687	9.28067	0.360984		57.9229	0.313372	-1.25358	0.303661
	8.10163	0.24348	0.554888	0.00145579		8.10163	0.24348	6.73715	0.229372		0.478353	0.231202	1.98468	0.253611
	8.22101	0.289822	0.564812	0.00157423		8.22101	0.289822	7.17275	0.24182		4.55673	0.264687	0.546463	0.385451
	7.82959	0.263809	0.527571	0.00120626		7.82959	0.263809	5.88419	0.204505		8.10163	0.24348	-0.13678	0.24388
	33.5324	0.289478	0.434973	0.00129248		33.5324	0.289478	5.6842	0.260869		8.22101	0.289822	-0.393884	0.306657
	66.2036	0.264861	0.382473	0.00106826		66.2036	0.264861	4.81158	0.216134		7.82959	0.263809	-0.610241	0.257984
	0.436956	0.224612	0.583623	0.00180465		0.436956	0.224612	9.6327	0.342893		33.5324	0.289478	-1.12077	0.238444
	1.28468	0.229031	0.620906	0.00164346		1.28468	0.229031	8.05504	0.350306		66.2036	0.264861	-1.27746	0.198458
	1.55588	0.241719	0.564259	0.00159841		1.55588	0.241719	9.70834	0.293145		0.436956	0.224612	2.57429	0.299832
	12.0256	0.254111	0.532148	0.00112122		12.0256	0.254111	7.10008	0.220136		1.28468	0.229031	2.05194	0.334957
	30.2457	0.187394	0.483885	0.000912408		30.2457	0.187394	5.50576	0.153472		1.55588	0.241719	1.82842	0.317134
	0.548011	0.0111076	0.557074	0.00194896		0.548011	0.0111076	9.24286	0.252453		12.0256	0.254111	-1.26244	0.263807
	2.29562	0.290519	0.630654	0.0020337		2.29562	0.290519	8.18622	0.396815		30.2457	0.187394	-1.31799	0.19522
											0.548011	0.0111076	2.33357	0.0161209
											2.29562	0.290519	1.85235	0.386174

## Sheet: Pulse experiment (panel C)
Figure 3–source data 1. Source data for Figure 3.
		Pulse of acetate (30 mM)
	Time (min)	Change in glucose concentration (mM)	Standard deviation	Change in acetate concentration (mM)	Standard deviation
	0	0	0	0	0
	1	-0.0693118	0.0324763	-0.0279079	0.00274014
	2	-0.151415	0.0731339	-0.0780009	0.0256936
	3	-0.189228	0.113019	-0.155334	0.0536419
	4	-0.269451	0.0494853	-0.165032	0.0899753
	5	-0.290764	0.00532554	-0.111098	0.00587567
	6	-0.230785	0.163378	-0.182878	0.0856042
	7	-0.464084	0.0347864	-0.237262	0.0619306
	8	-0.551879	0.0484772	-0.276903	0.099141
		Pulse of H2O (control)
	Time (min)	Change in glucose concentration (mM)	Standard deviation	Change in acetate concentration (mM)	Standard deviation
	0	0	0	0	0
	1	-0.195638	0.0580236	0.0101207	0.00511726
	2	-0.325513	0.109116	0.0597401	0.0225072
	3	-0.433785	0.0470904	0.0867873	0.040319
	4	-0.628519	0.0523318	0.0866903	0.0375489
	5	-0.726914	0.0656199	0.10433	0.0372353
	6	-0.892909	0.133896	0.128507	0.0444944
	7	-1.07123	0.168288	0.130026	0.045029
	8	-1.16286	0.0351547	0.187337	0.0239824
