# Supplementary material for: Control and regulation of acetate overflow in Escherichia coli
Source: eLife journal article supplement (doi:10.7554/elife.63661), 2021-03-15

Enjalbert\_2017 (pulse 30mM ace

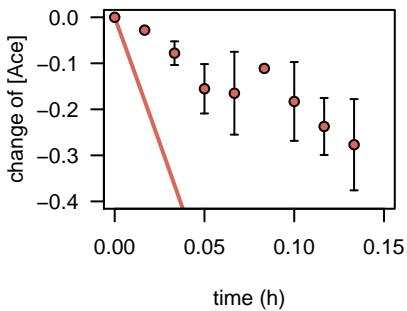

Enjalbert\_2017 (pulse 30mM ace

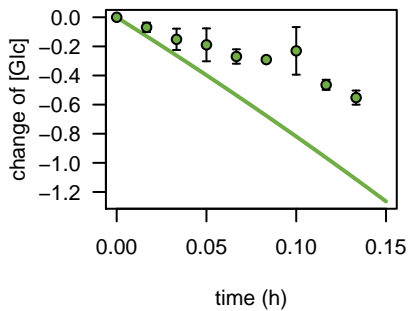

Enjalbert\_2017 (control)

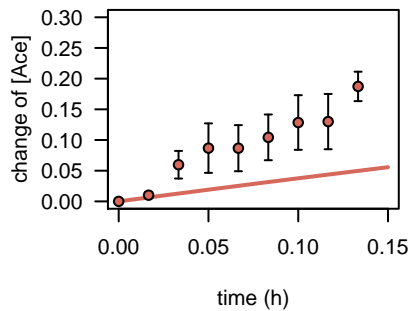

Enjalbert\_2017 (control)

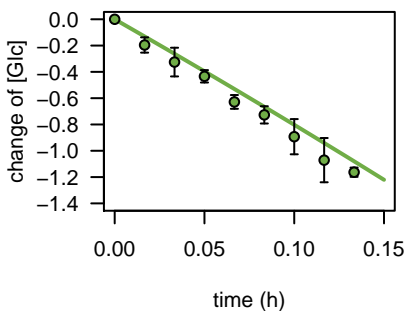

Renilla\_2012

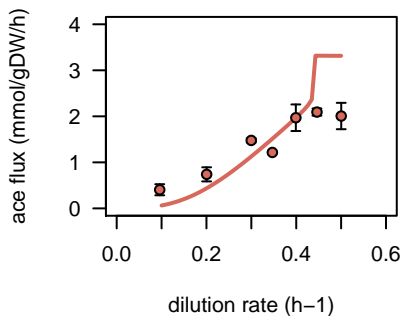

Renilla\_2012

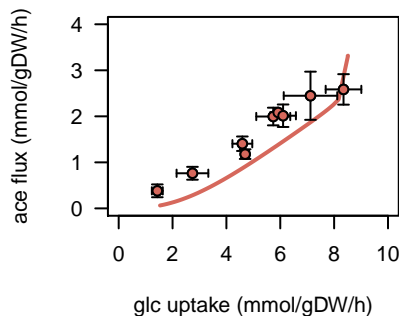

Enjalbert\_2017

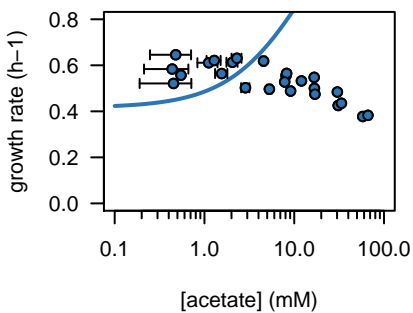

Enjalbert\_2017

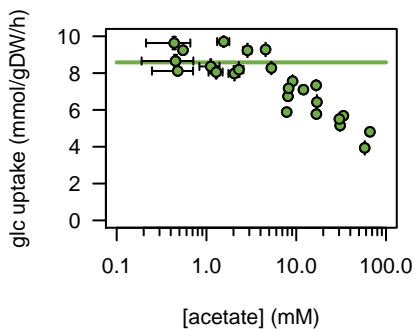

Enjalbert\_2017, Pinhal\_2019

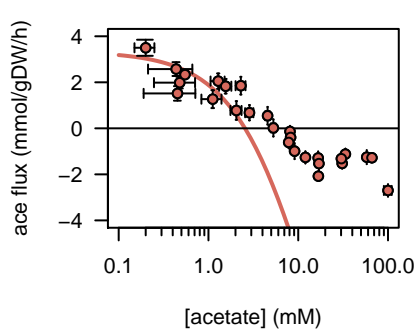

Supplement: supp [file elife-63661-supp-v1.zip]
