# Supplementary material for: Control and regulation of acetate overflow in Escherichia coli
Source: eLife. 2021 Mar 15;10:e63661. doi: 10.7554/eLife.63661 (PMC8021400; doi:10.7554/eLife.63661)
Supplement: Supplementary file 1. [file elife-63661-supp1.zip]

Archive with 44 entries (39 files):
- acetate_regulation/
- acetate_regulation/1-Model_construction.R
- acetate_regulation/2-Model_validation.R
- acetate_regulation/3-Metabolic_control_analyses.R
- acetate_regulation/4-Regulation_analyses.R
- acetate_regulation/LICENSE
- acetate_regulation/misc.R
- acetate_regulation/model/
- acetate_regulation/model/cps/
- acetate_regulation/model/cps/data_10mM.txt
- acetate_regulation/model/cps/data_1mM.txt
- acetate_regulation/model/cps/data_30mM.txt
- acetate_regulation/model/cps/Millard2020_Ecoli_glc_ace_isotopic_model_1.cps
- acetate_regulation/model/cps/Millard2020_Ecoli_glc_ace_isotopic_model_2.cps
- acetate_regulation/model/cps/Millard2020_Ecoli_glc_ace_isotopic_model_3.cps
- acetate_regulation/model/cps/Millard2020_Ecoli_glc_ace_isotopic_model_4.cps
- acetate_regulation/model/cps/Millard2020_Ecoli_glc_ace_isotopic_model_4_MC.cps
- acetate_regulation/model/cps/Millard2020_Ecoli_glc_ace_kinetic_model_1.cps
- acetate_regulation/model/cps/Millard2020_Ecoli_glc_ace_kinetic_model_2.cps
- acetate_regulation/model/cps/Millard2020_Ecoli_glc_ace_kinetic_model_3.cps
- acetate_regulation/model/cps/Millard2020_Ecoli_glc_ace_kinetic_model_4.cps
- acetate_regulation/model/sbml/
- acetate_regulation/model/sbml/Millard2020_Ecoli_glc_ace_kinetic_model.xml
- acetate_regulation/README.md
- acetate_regulation/results/
- acetate_regulation/results/Figure 1-figure supplement 1.pdf
- acetate_regulation/results/Figure 1-figure supplement 2.pdf
- acetate_regulation/results/Figure 1-figure supplement 3.pdf
- acetate_regulation/results/Figure 1B.pdf
- acetate_regulation/results/Figure 1C.pdf
- acetate_regulation/results/Figure 3.pdf
- acetate_regulation/results/Figure 3–figure supplement 1.pdf
- acetate_regulation/results/Figure 3–figure supplement 2.pdf
- acetate_regulation/results/Figure 3–figure supplement 3.pdf
- acetate_regulation/results/Figure 3–figure supplement 4.pdf
- acetate_regulation/results/Figure 4.pdf
- acetate_regulation/results/Figure 5.pdf
- acetate_regulation/results/Figure 5–figure supplement 1.pdf
- acetate_regulation/results/Figure 5–figure supplement 2.pdf
- acetate_regulation/results/Figure 5–figure supplement 3.pdf
- acetate_regulation/results/Figure 6.pdf
- acetate_regulation/results/mc_results_100.RData
- acetate_regulation/results/parameters_stats.txt
- acetate_regulation/set_env.R
