# Supplementary material for: Control and regulation of acetate overflow in Escherichia coli
Source: eLife. 2021 Mar 15;10:e63661. doi: 10.7554/eLife.63661 (PMC8021400; doi:10.7554/eLife.63661)
Supplement: Supplementary file 1. [file elife-63661-supp1.zip › acetate_regulation/model/cps/data_1mM.txt]

time	Ace	X	Glc	Ace_enr
0.00	0.958577777777778	0.06308	12.6597333333333	0.0576780415430267
0.75	1.21777777777778	0.10374	11.9168	0.32529197080292
1.25	1.45604444444444	0.1406	11.9826666666667	0.478160007325784
1.58	1.61364444444444	0.17138	11.2482666666667	0.569183287081464
1.92	1.84195555555556	0.21888	10.5389333333333	0.636714602837564
2.25	2.09435555555556	0.26828	10.0416	0.703456910638117
2.58	2.34062222222222	0.3268	9.09706666666667	0.762741151450707
2.92	2.54257777777777	0.38228	7.84106666666667	0.81056845196476
3.25	2.87071111111111	0.5016	6.57813333333333	0.856651855521667
3.58	3.21031111111111	0.6384	5.30506666666667	0.887487540148411
3.92	3.45235555555556	0.7486	3.43946666666667	0.915020984062411
4.25	3.82533333333334	0.912	1.42053333333333	0.934785639595678
