# Supplementary material for: Control and regulation of acetate overflow in Escherichia coli
Source: eLife. 2021 Mar 15;10:e63661. doi: 10.7554/eLife.63661 (PMC8021400; doi:10.7554/eLife.63661)
Supplement: Supplementary file 1. [file elife-63661-supp1.zip › acetate_regulation/model/cps/data_30mM.txt]

time	Ace	X	Glc	Ace_enr
0	29.9277777777777	0.0627	12.6936	0.0118997586782996
0.72	29.7741333333334	0.09196	12.1504	0.0193919255789514
1.22	30.2449777777778	0.11932	11.9272	0.0268444935577917
1.55	30.0097777777778	0.14136	11.4909333333333	0.0336616213974705
1.88	29.6730666666666	0.1748	10.9416	0.0410248575588187
2.22	30.1202222222223	0.21204	10.3442666666667	0.0471030905777589
2.55	29.9384444444444	0.2508	10.2381333333333	0.0572582261380759
2.88	29.7116888888888	0.29108	9.62586666666667	0.06711313018595
3.22	29.7473777777778	0.3344	9.24586666666667	0.0753739638675902
3.55	29.8632	0.3876	8.50746666666667	0.0860814201648408
3.88	29.2348	0.4978	7.41546666666667	0.101288722876694
4.22	29.0688444444445	0.6118	6.11973333333333	0.119047655450891
4.72	28.2377777777778	0.7524	4.36613333333333	0.149720626426379
5.22	27.6480888888889	0.9994	2.0368	0.185932079693674
5.72	27.1892	1.1172	0.05	0.214340007552018
