# Supplementary material for: Control and regulation of acetate overflow in Escherichia coli
Source: eLife. 2021 Mar 15;10:e63661. doi: 10.7554/eLife.63661 (PMC8021400; doi:10.7554/eLife.63661)
Supplement: Supplementary file 1. [file elife-63661-supp1.zip › acetate_regulation/set_env.R]

####################################
# Supplementary information folder #
####################################

# We assume to be already in the working directory, otherwise update the path of the supplementary data folder
wd <- getwd()
#wd <- "C:/Users/millard/Documents/GIT/acetate_regulation/acetate_regulation/"

model_dir <- file.path(wd, "model", "cps")
results_dir <- file.path(wd, "results")

###################
# Set environment #
###################

# load libraries
library(RColorBrewer)
library(gplots)
library(CoRC)
library(stringr)

setwd(wd)
source("misc.R")
