# Supplementary figures and images for: Control and regulation of acetate overflow in Escherichia coli
Source: eLife journal article supplement (doi:10.7554/elife.63661), 2021-03-15

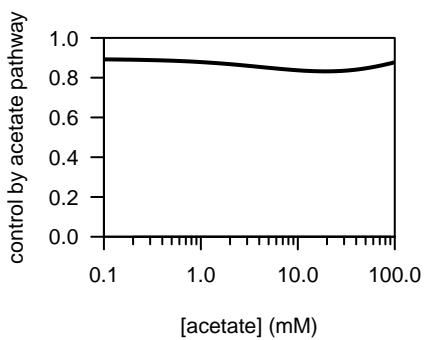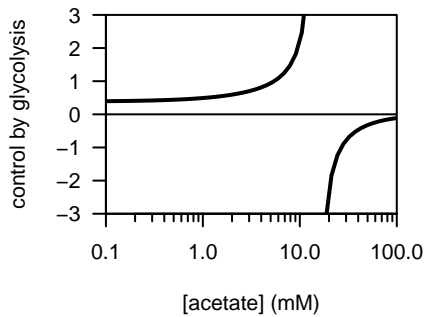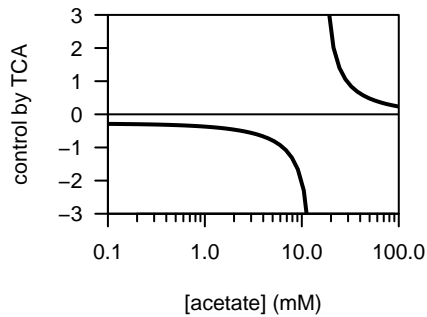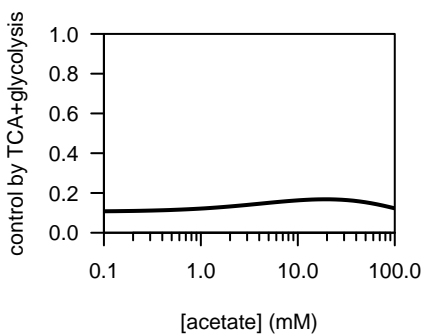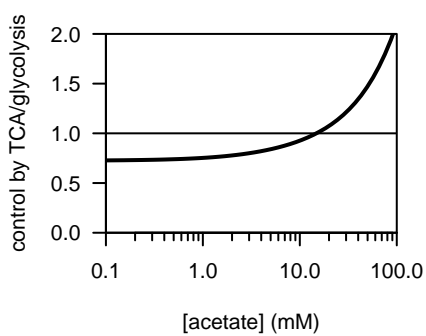

Supplement: supp [file elife-63661-supp-v1.zip]

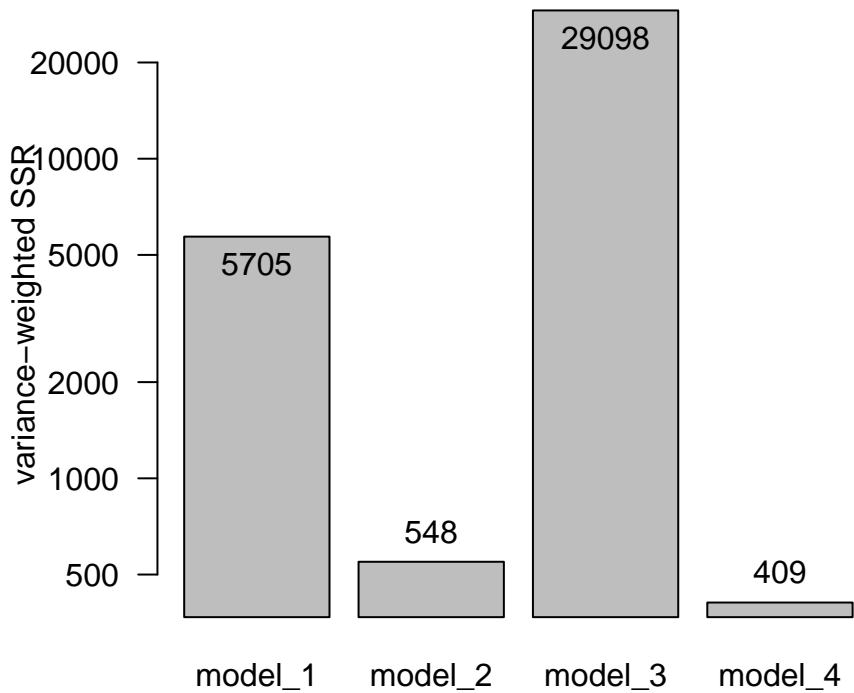

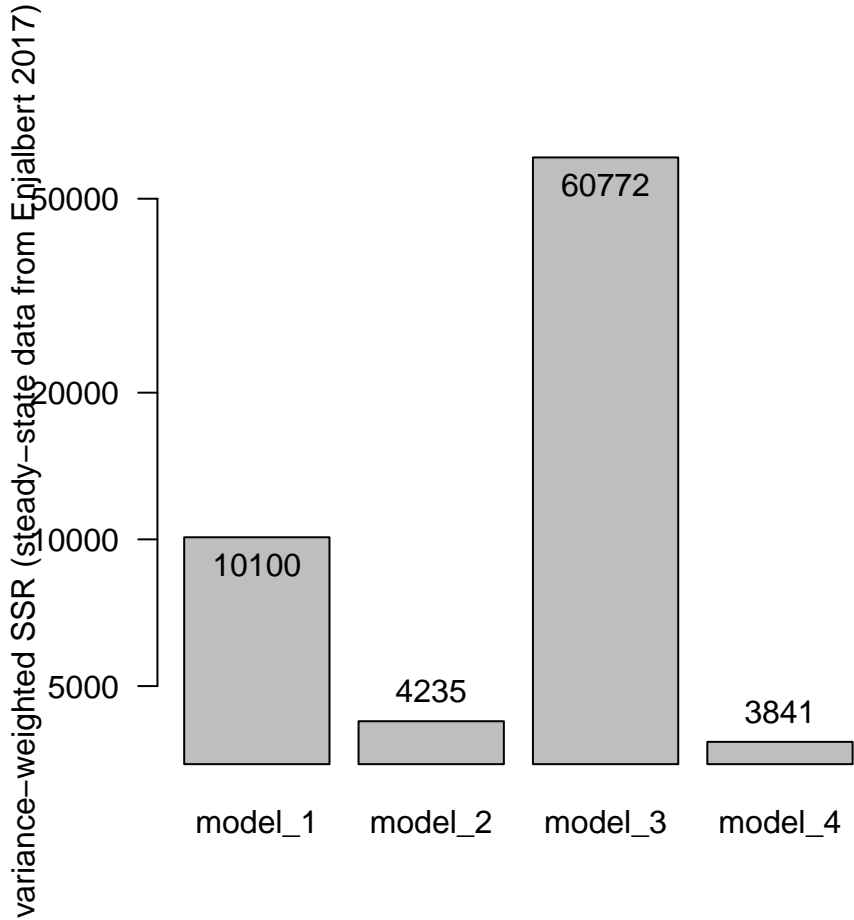

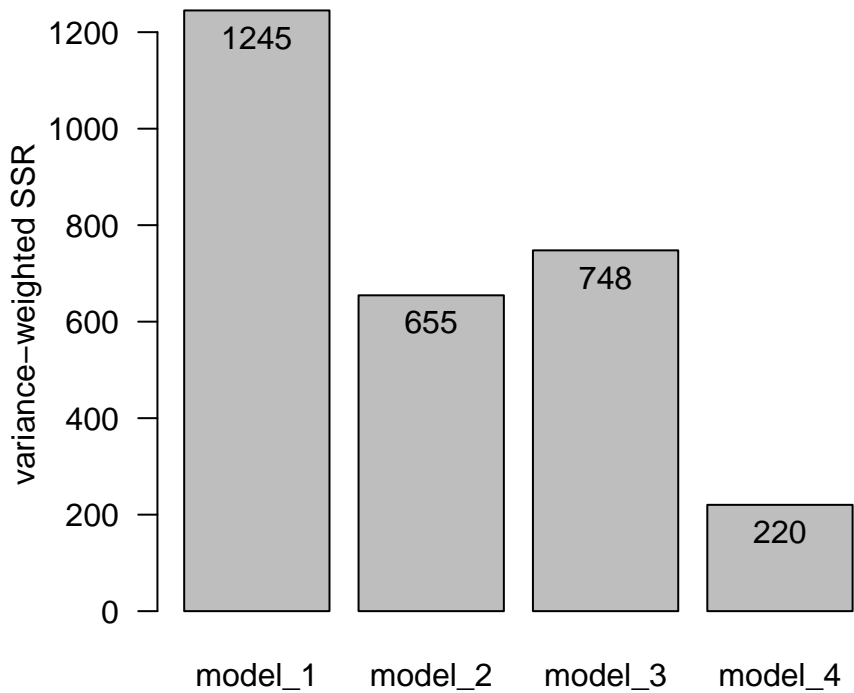

Supplement: supp [file elife-63661-supp-v1.zip]

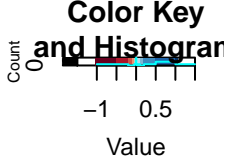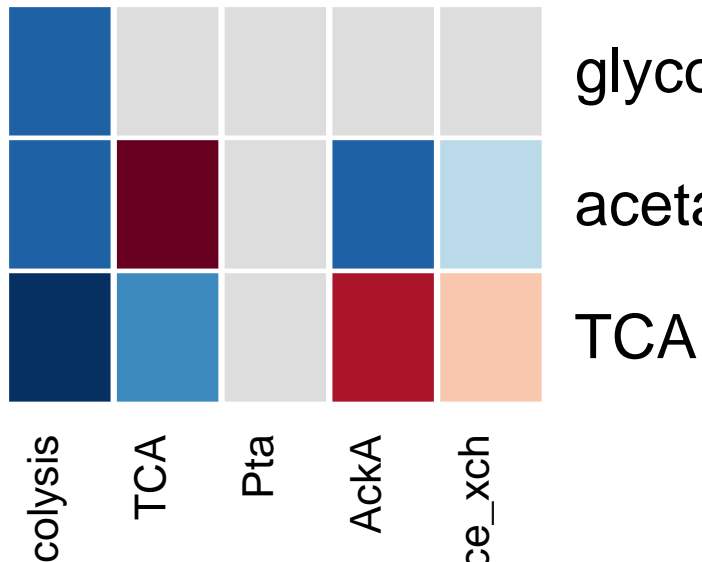

Supplement: supp [file elife-63661-supp-v1.zip]

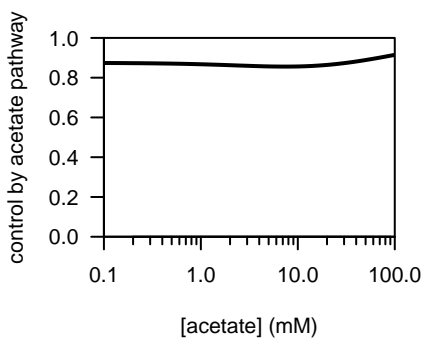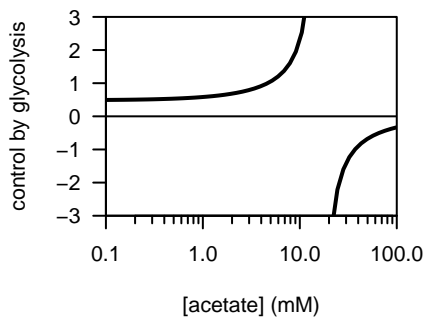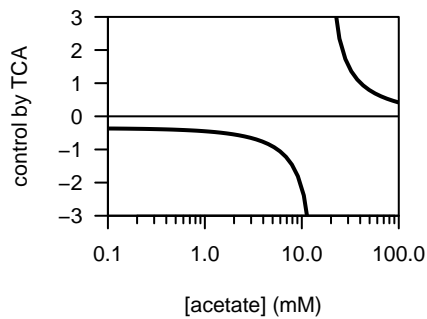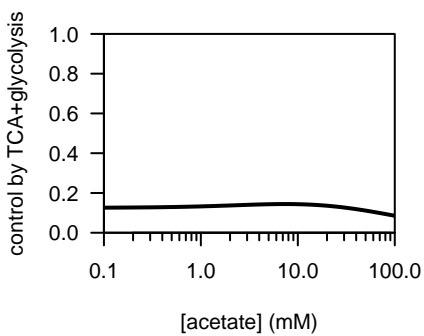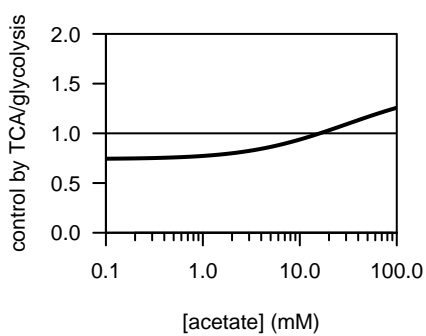

Supplement: supp [file elife-63661-supp-v1.zip]

[acetate]=1mM

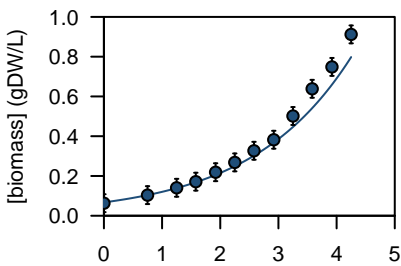

[acetate]=10mM

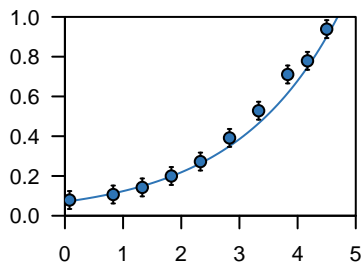

[acetate]=30mM

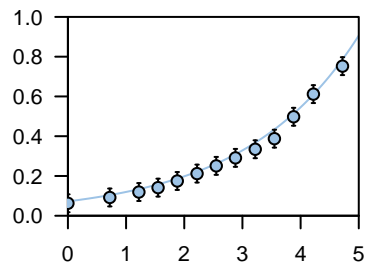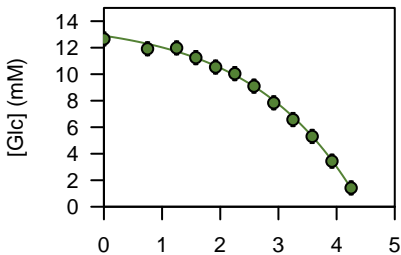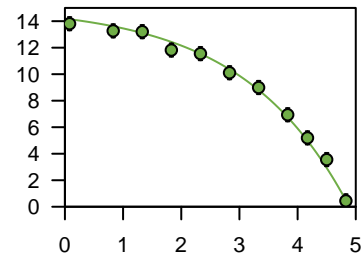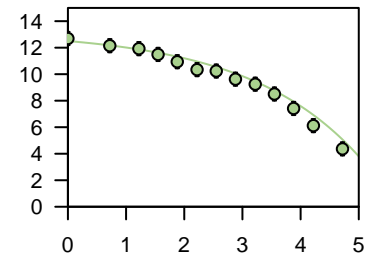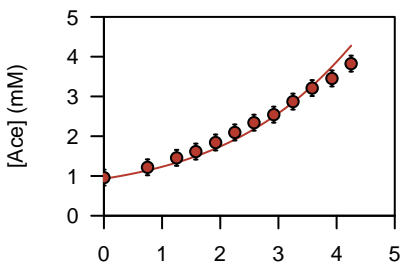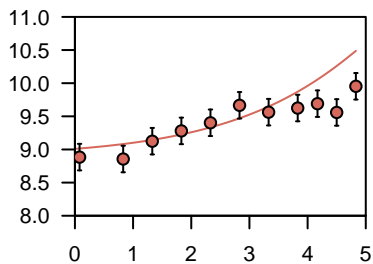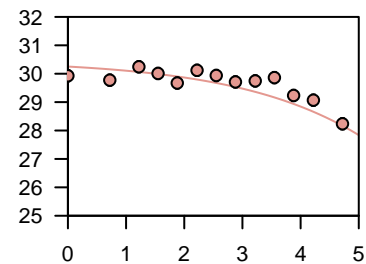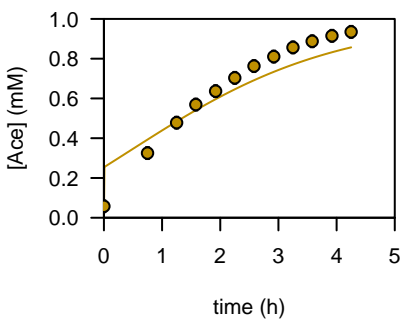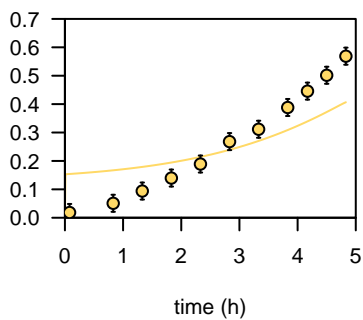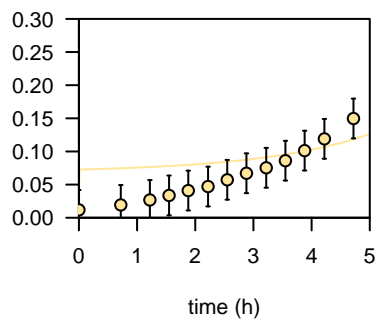

Supplement: supp [file elife-63661-supp-v1.zip]

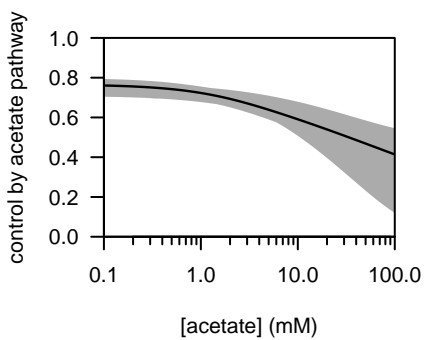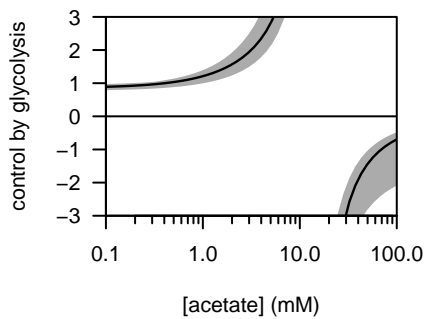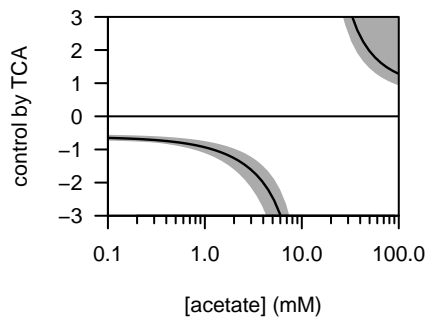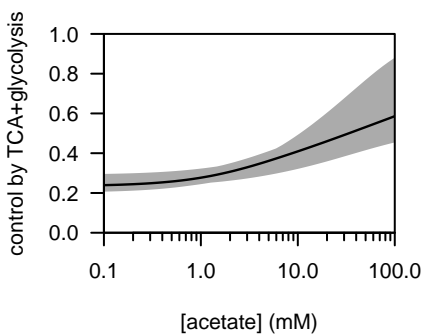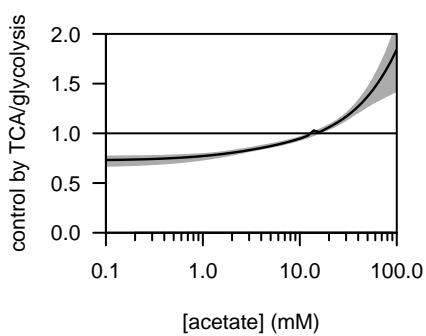

Supplement: supp [file elife-63661-supp-v1.zip]

[acetate]=1mM

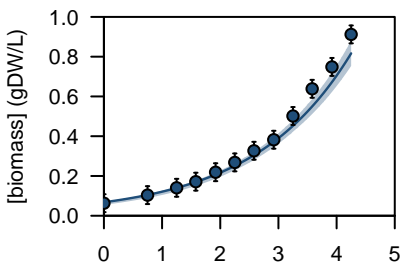

[acetate]=10mM

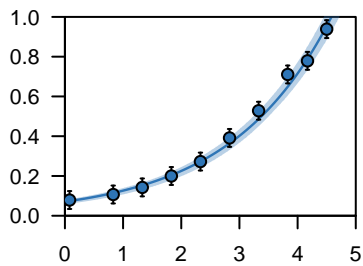

[acetate]=30mM

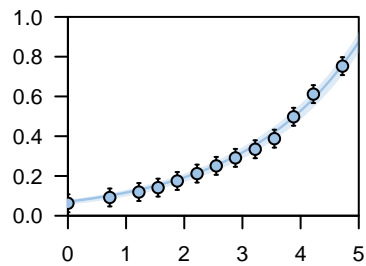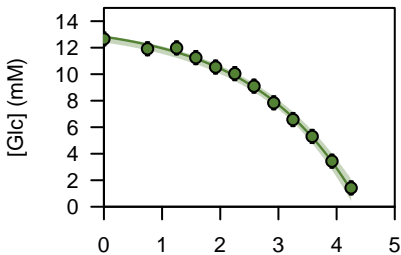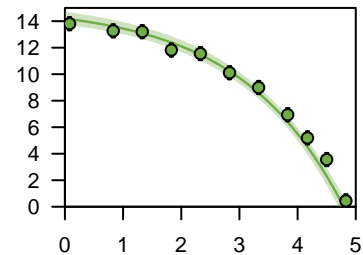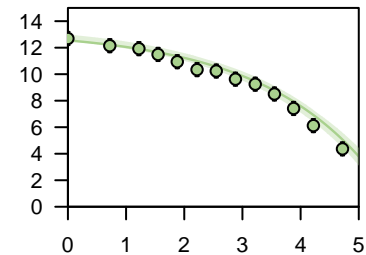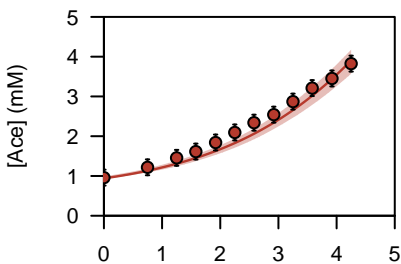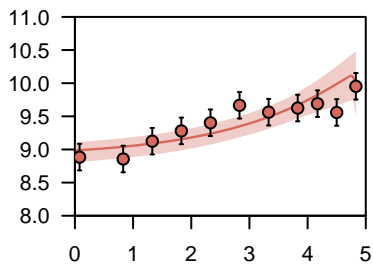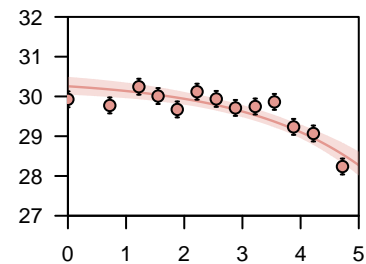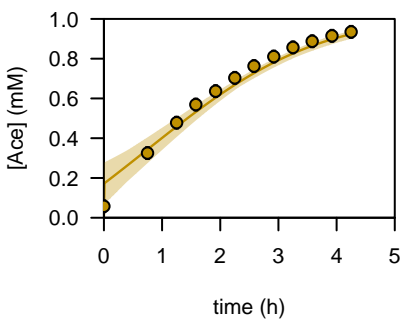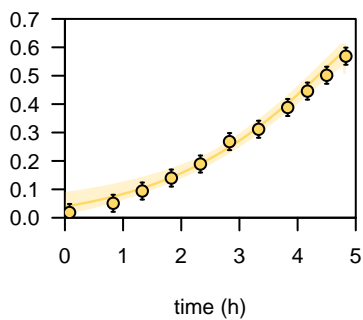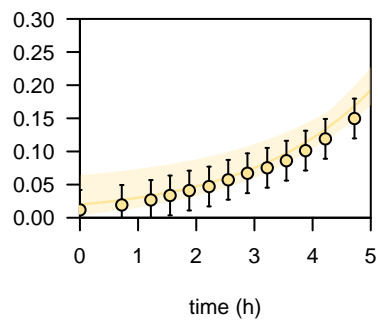

Supplement: supp [file elife-63661-supp-v1.zip]

[acetate]=1mM

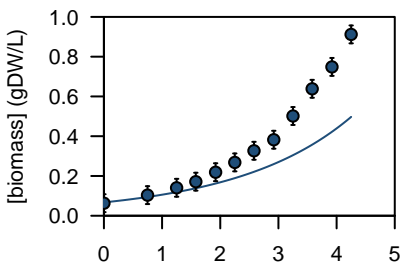

[acetate]=10mM

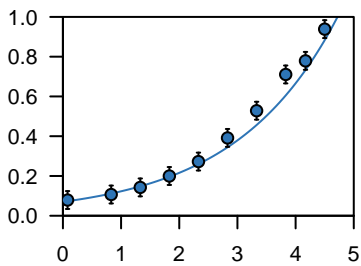

[acetate]=30mM

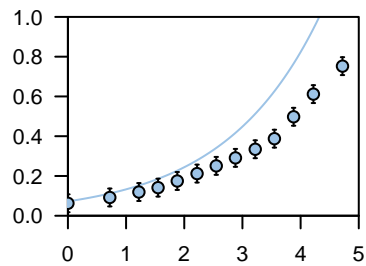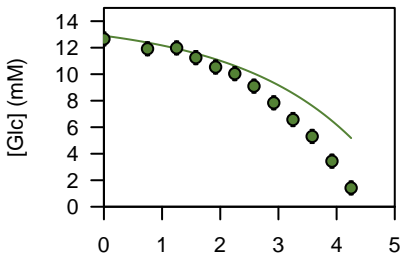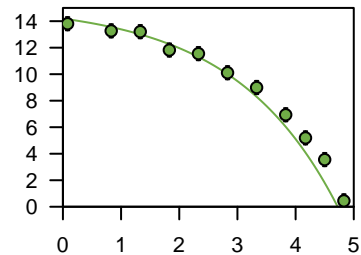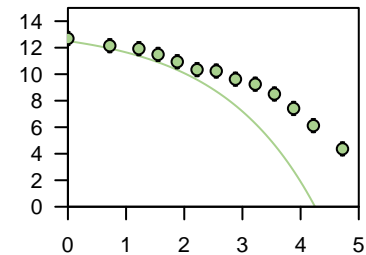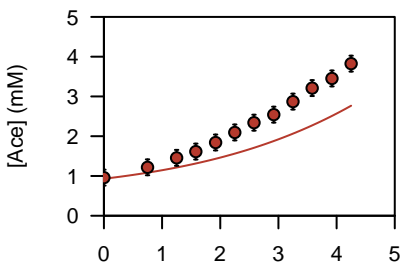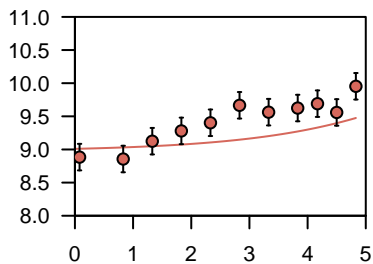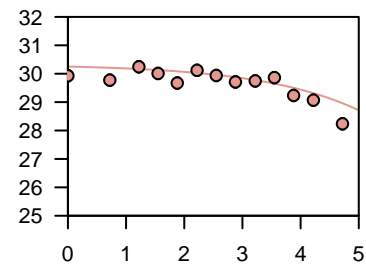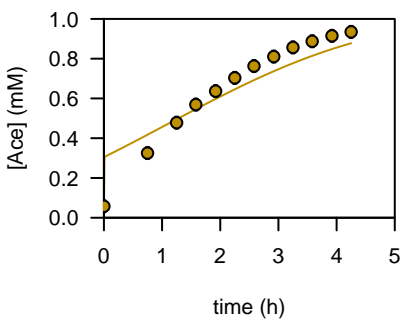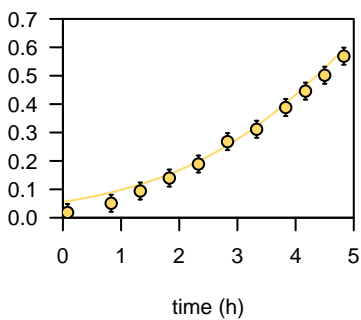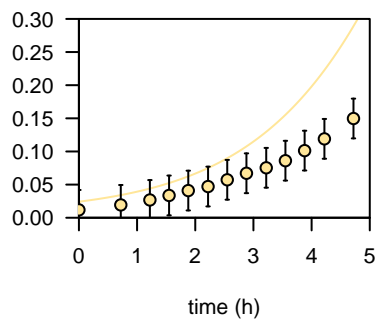

Supplement: supp [file elife-63661-supp-v1.zip]

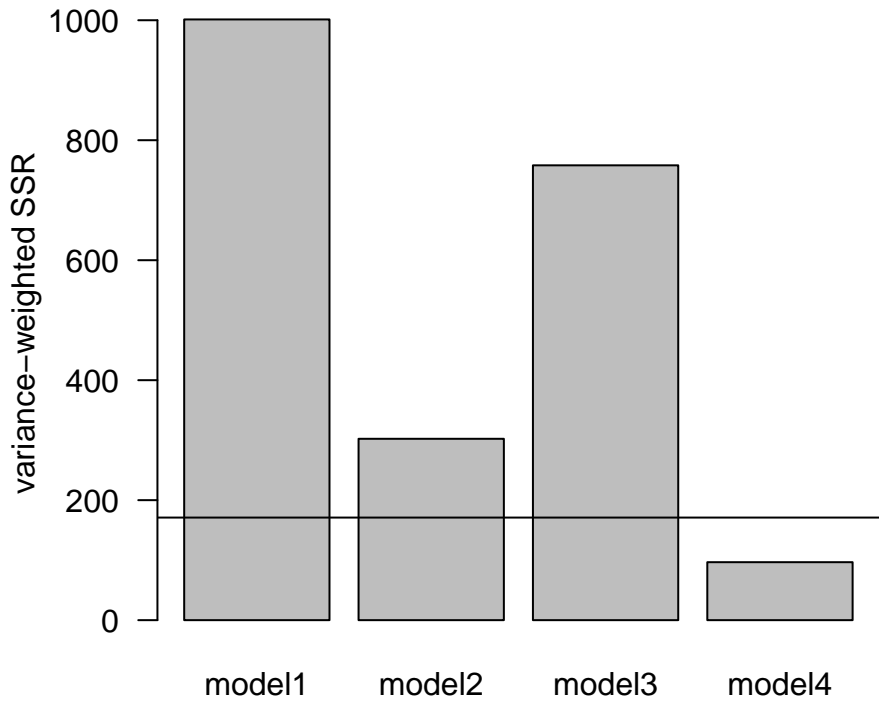

Supplement: supp [file elife-63661-supp-v1.zip]

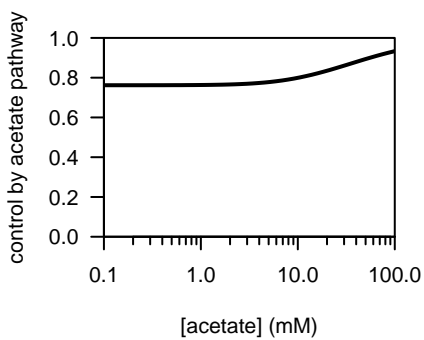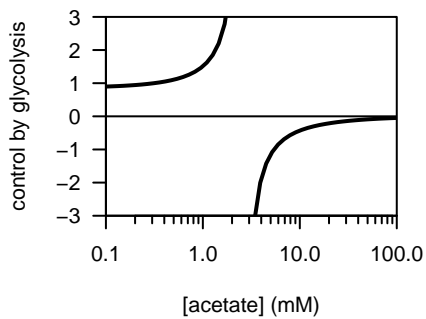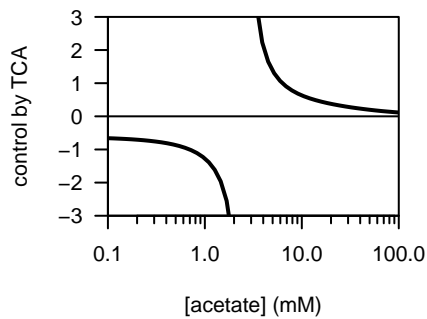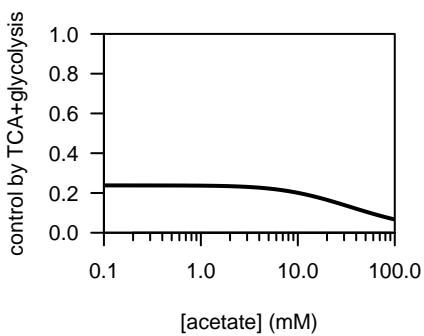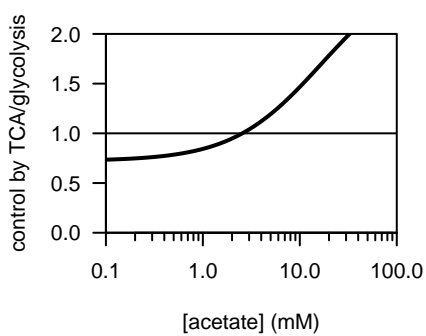

Supplement: supp [file elife-63661-supp-v1.zip]

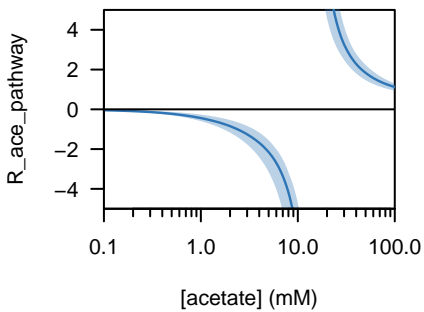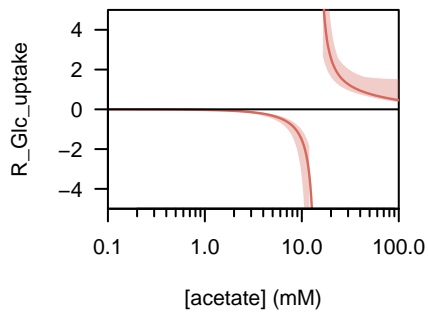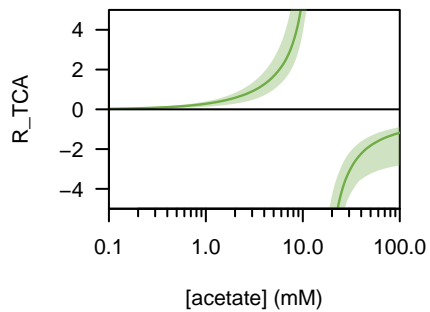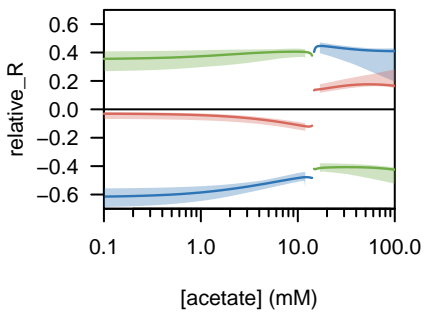

Supplement: supp [file elife-63661-supp-v1.zip]

[acetate]=1mM

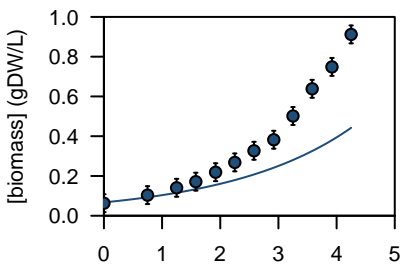

[acetate]=10mM

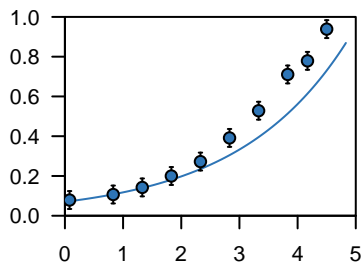

[acetate]=30mM

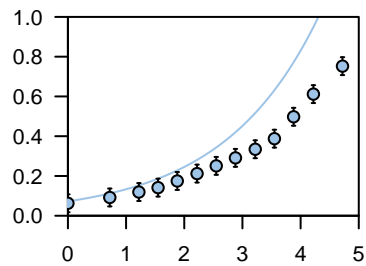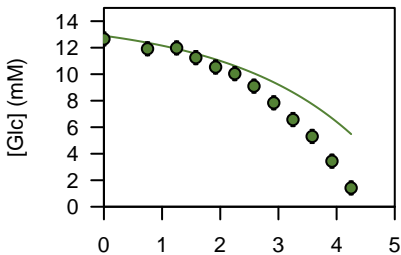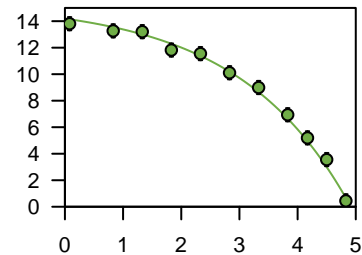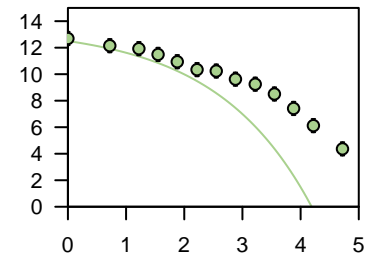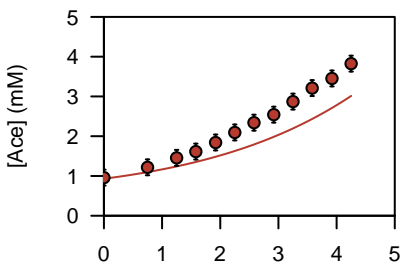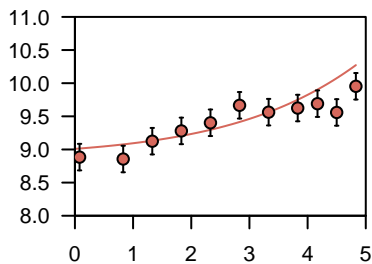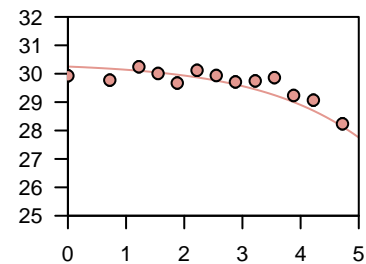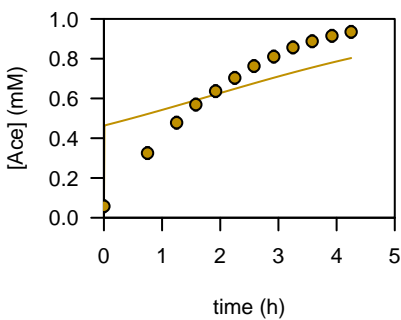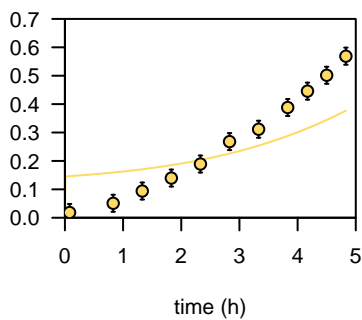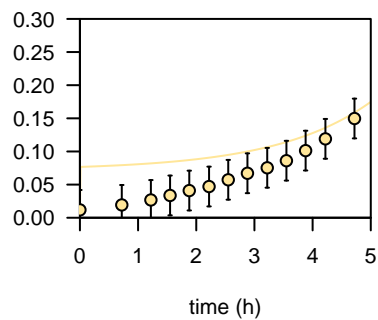

Supplement: supp [file elife-63661-supp-v1.zip]
